# Supplementary material
Source: publisher site journal article supplement (https://www.dovepress.com/article/466011)
Supplement: Supplementary file 1 [file get_supplementary_file.php]

**Supplementary information**

**Results**


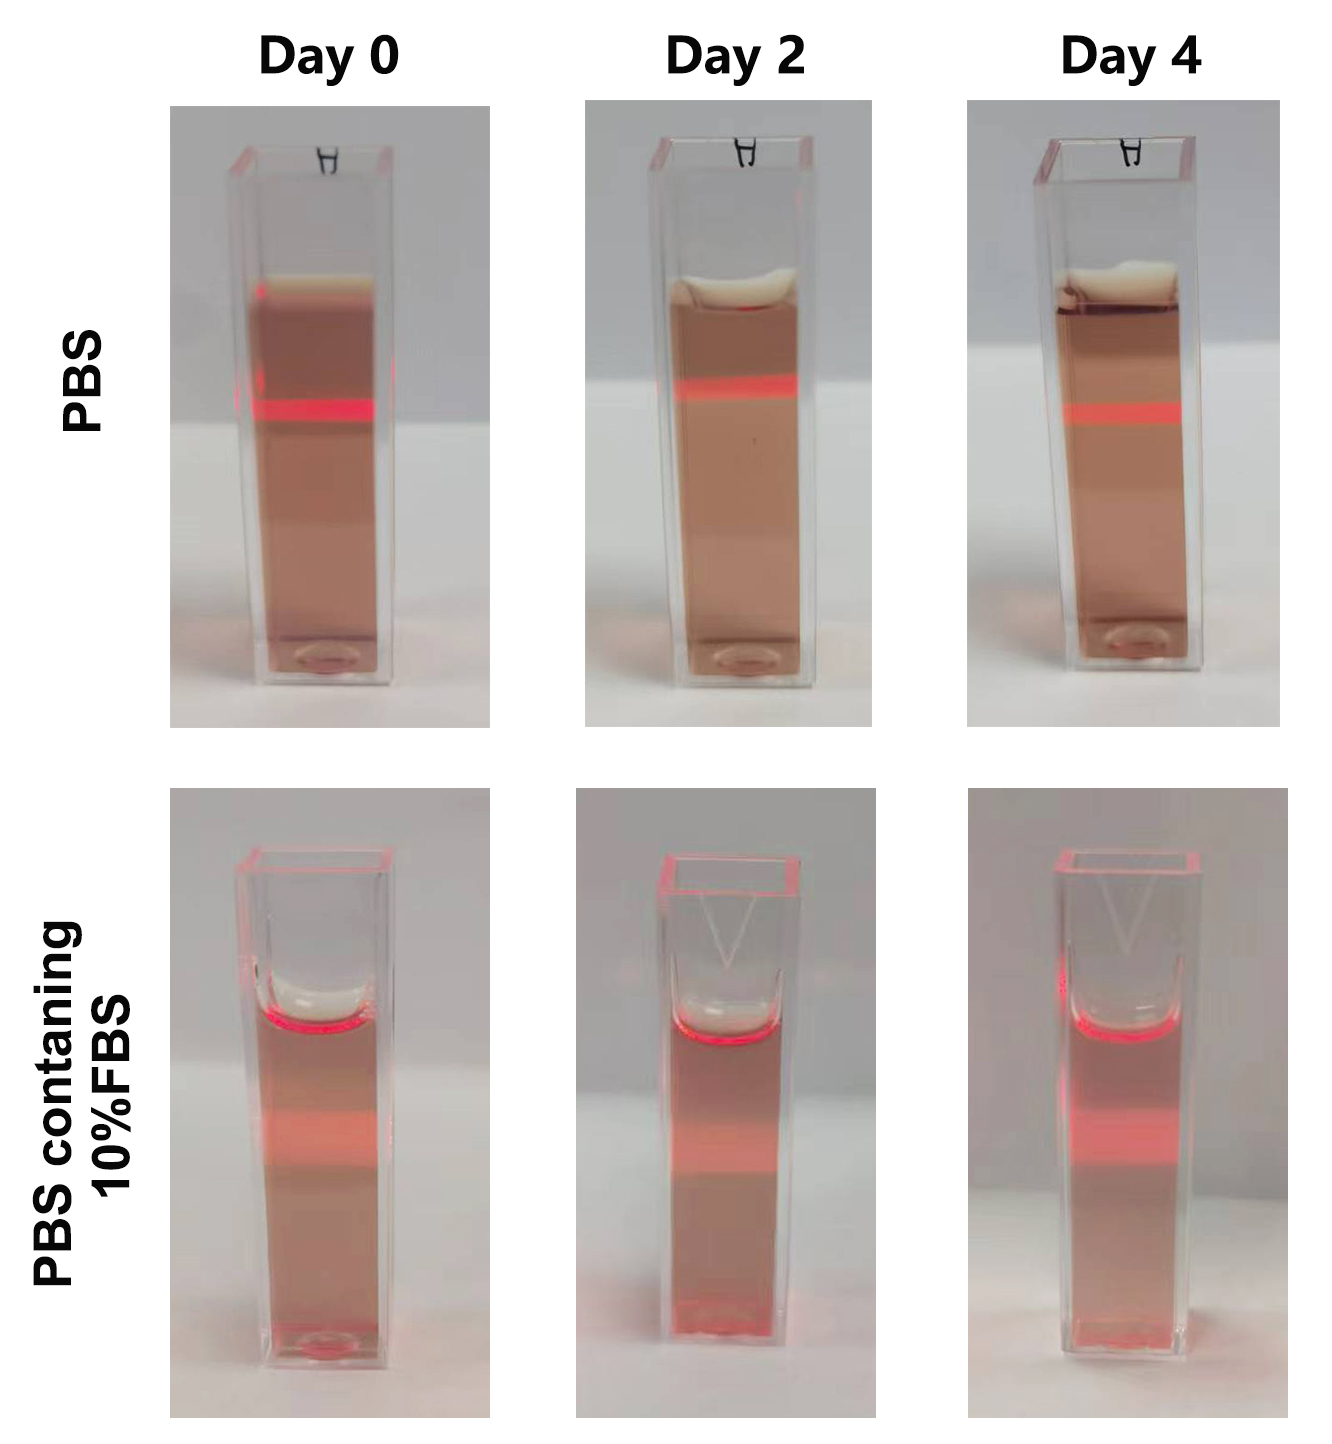


**Figure S1** Photographs of PMOF@HA stored in PBS buffer or PBS buffer containing 10% FBS for different times.


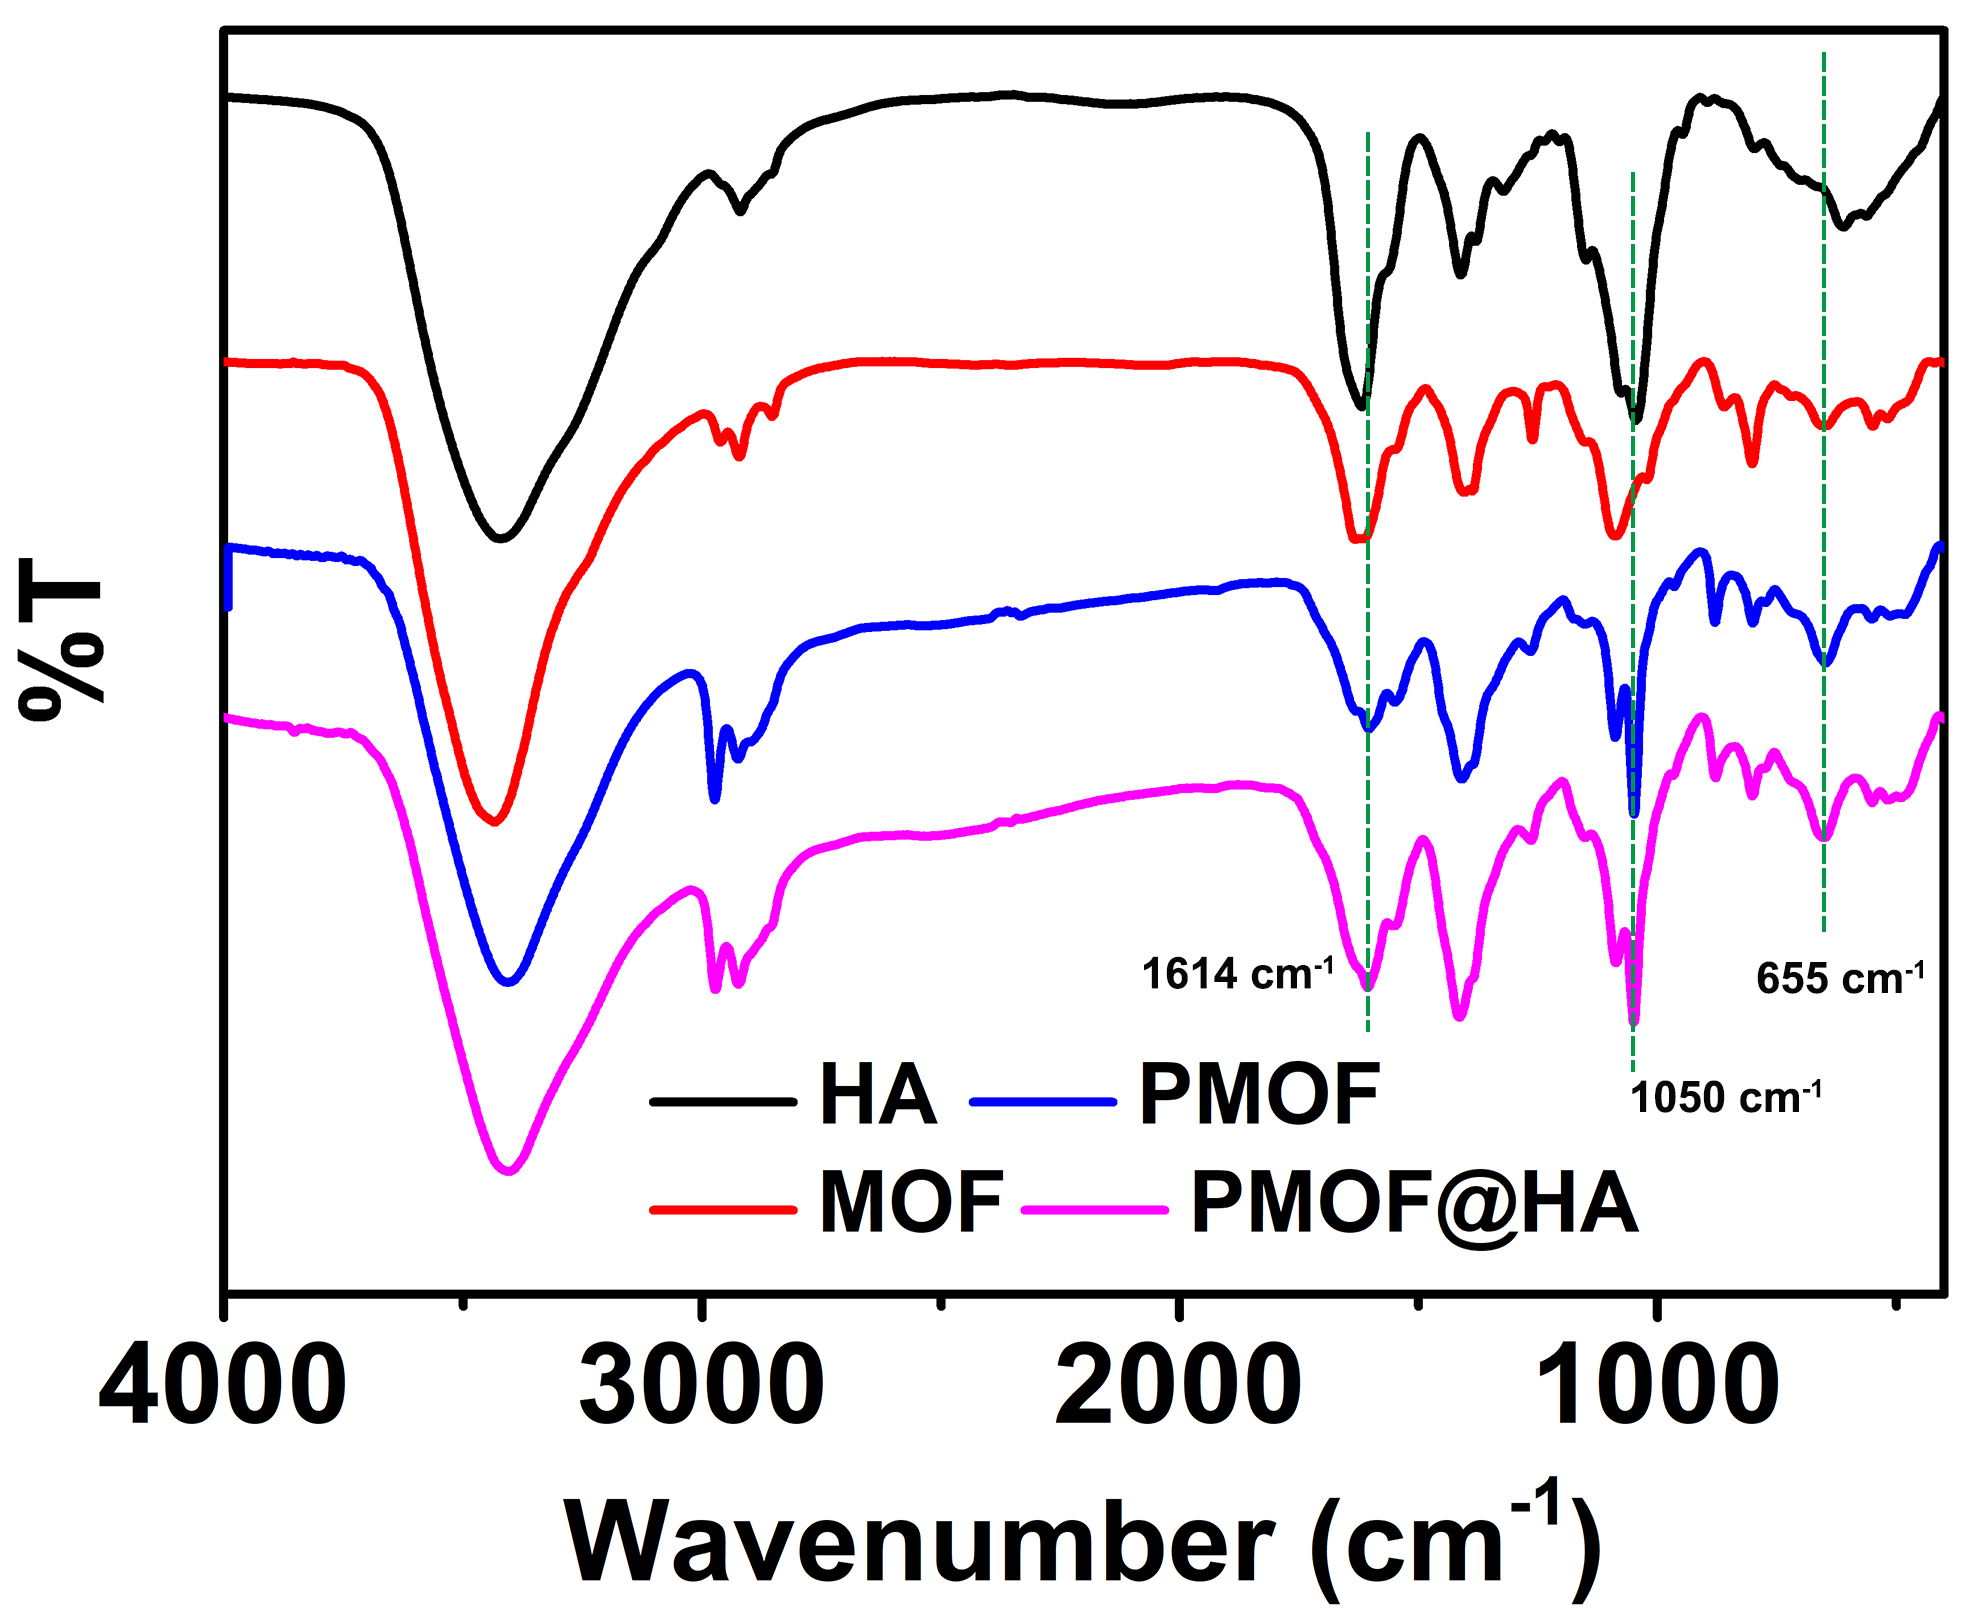


**Figure S2** FT-IR spectra of HA, MOF, PMOF and PMOF@HA.


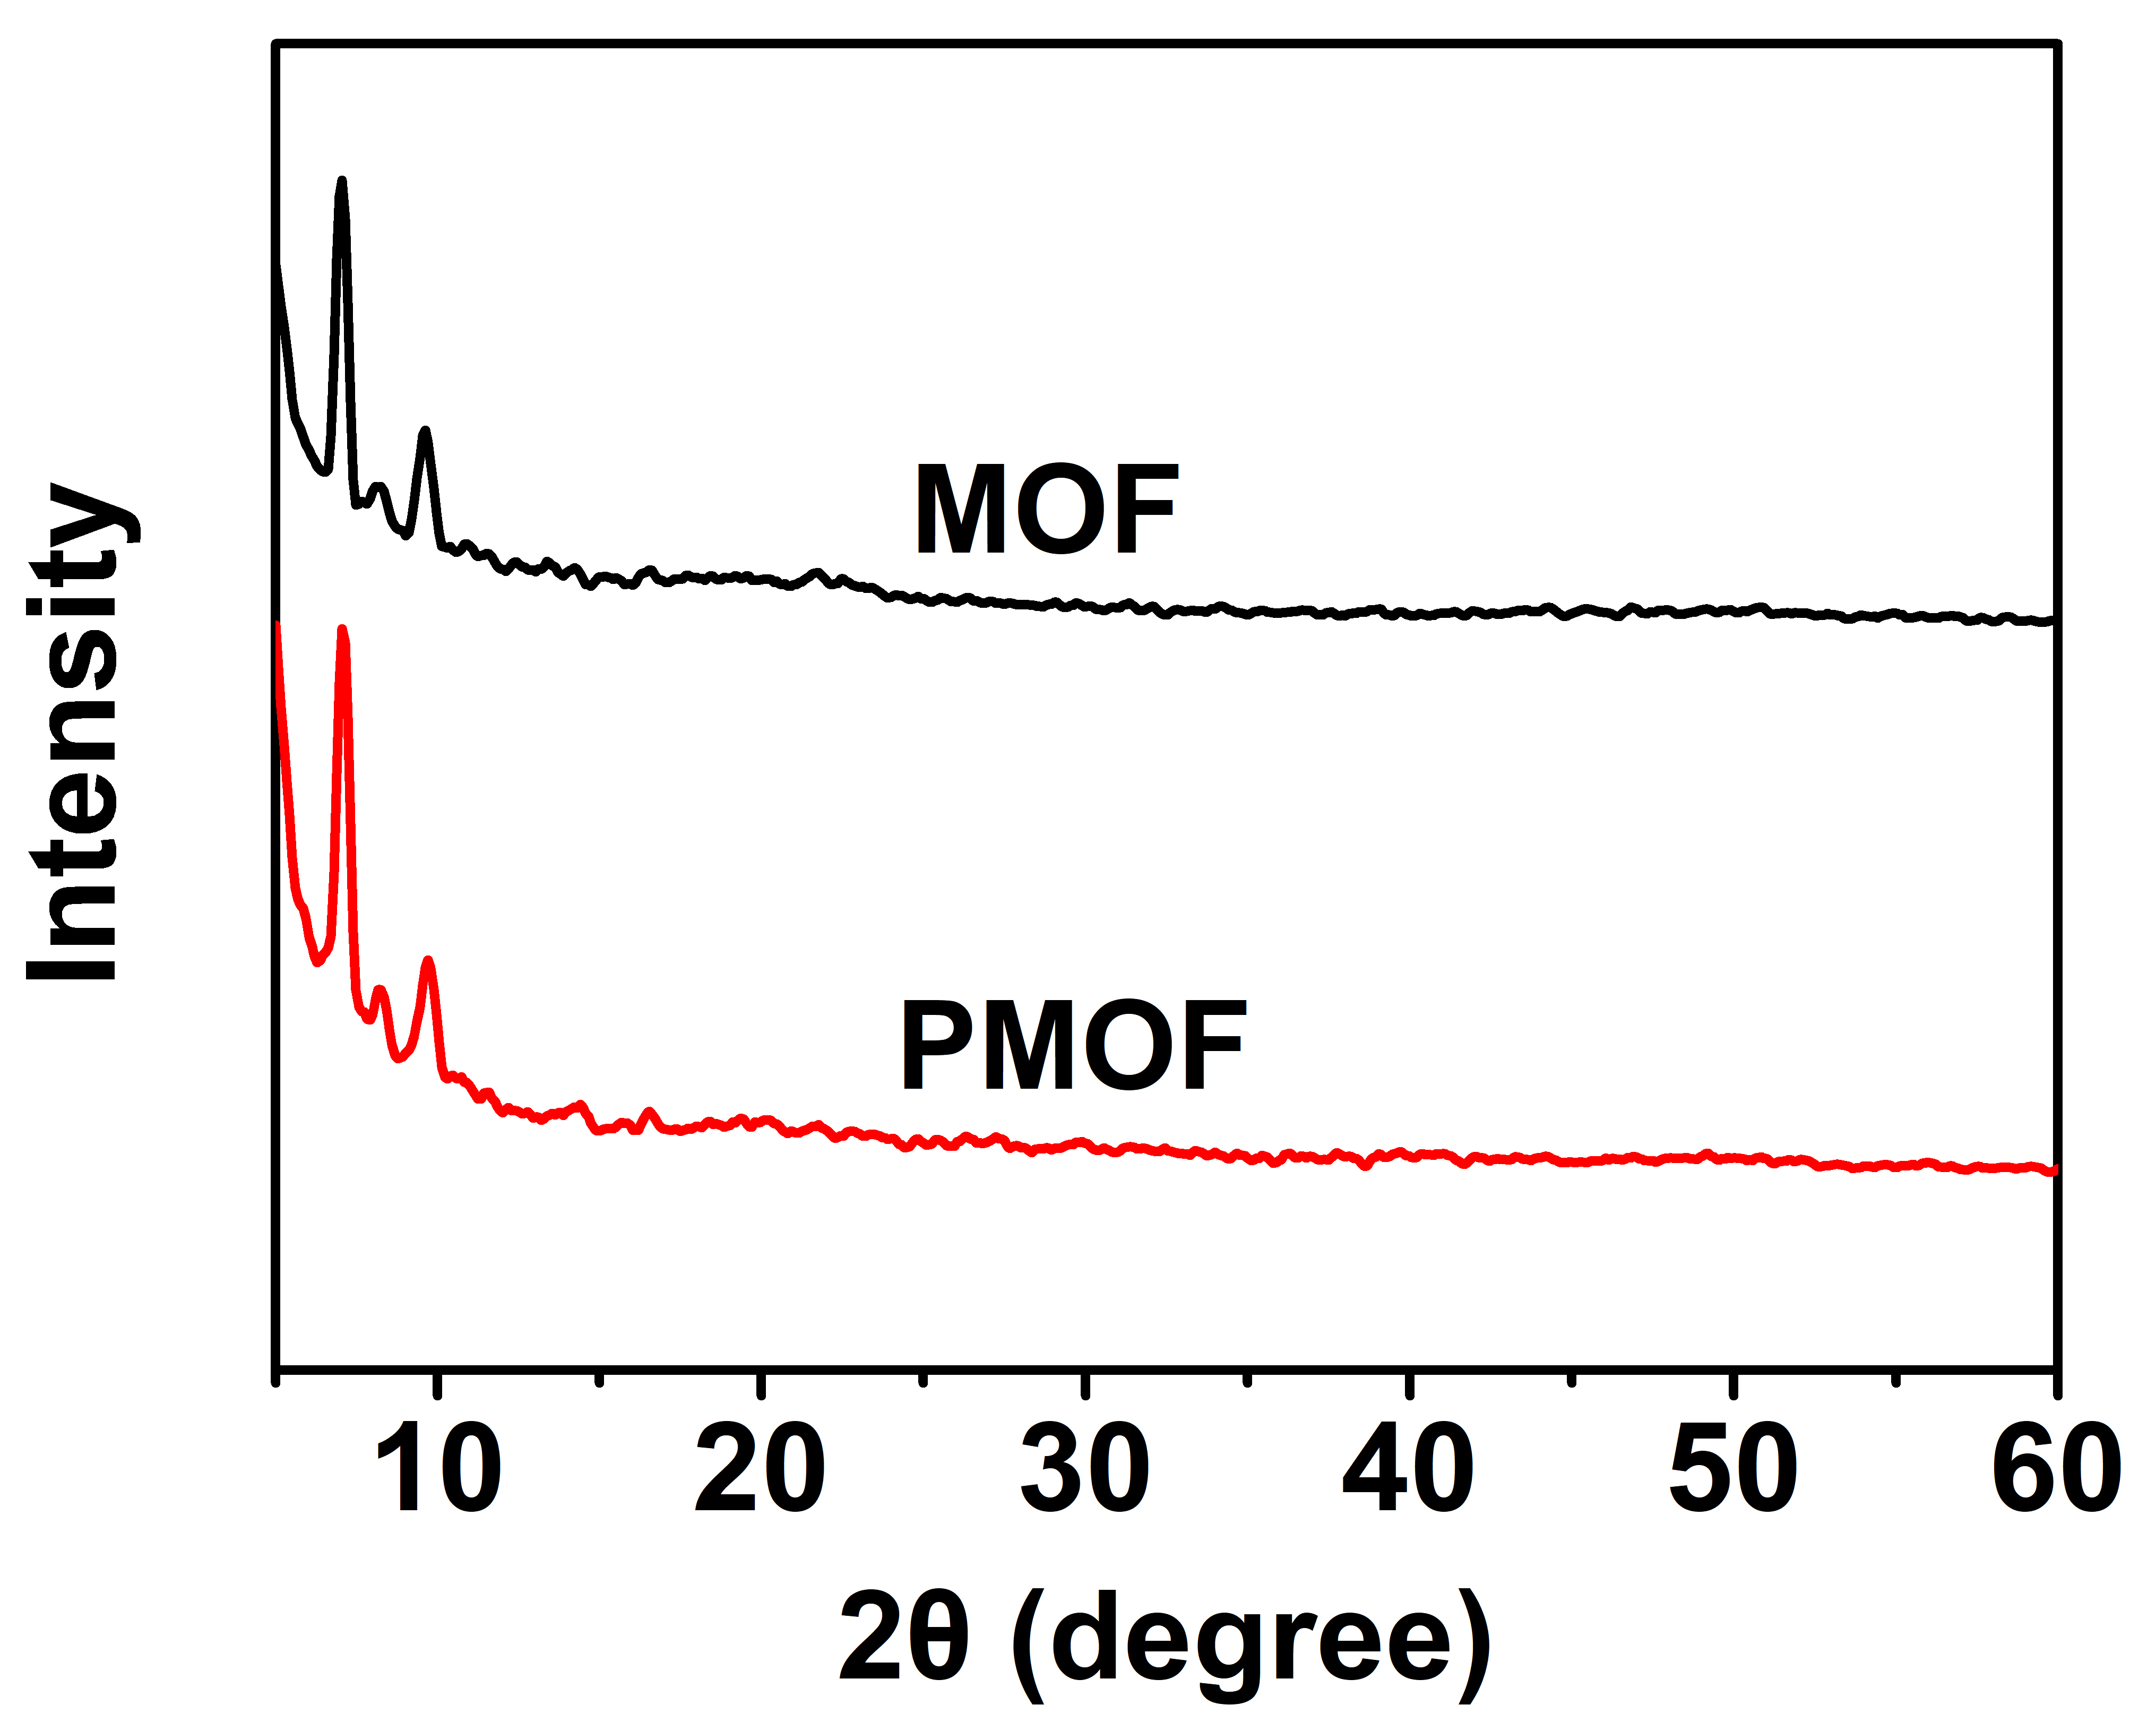


**Figure S3** XRD patterns of MOF and PMOF nanosheets.


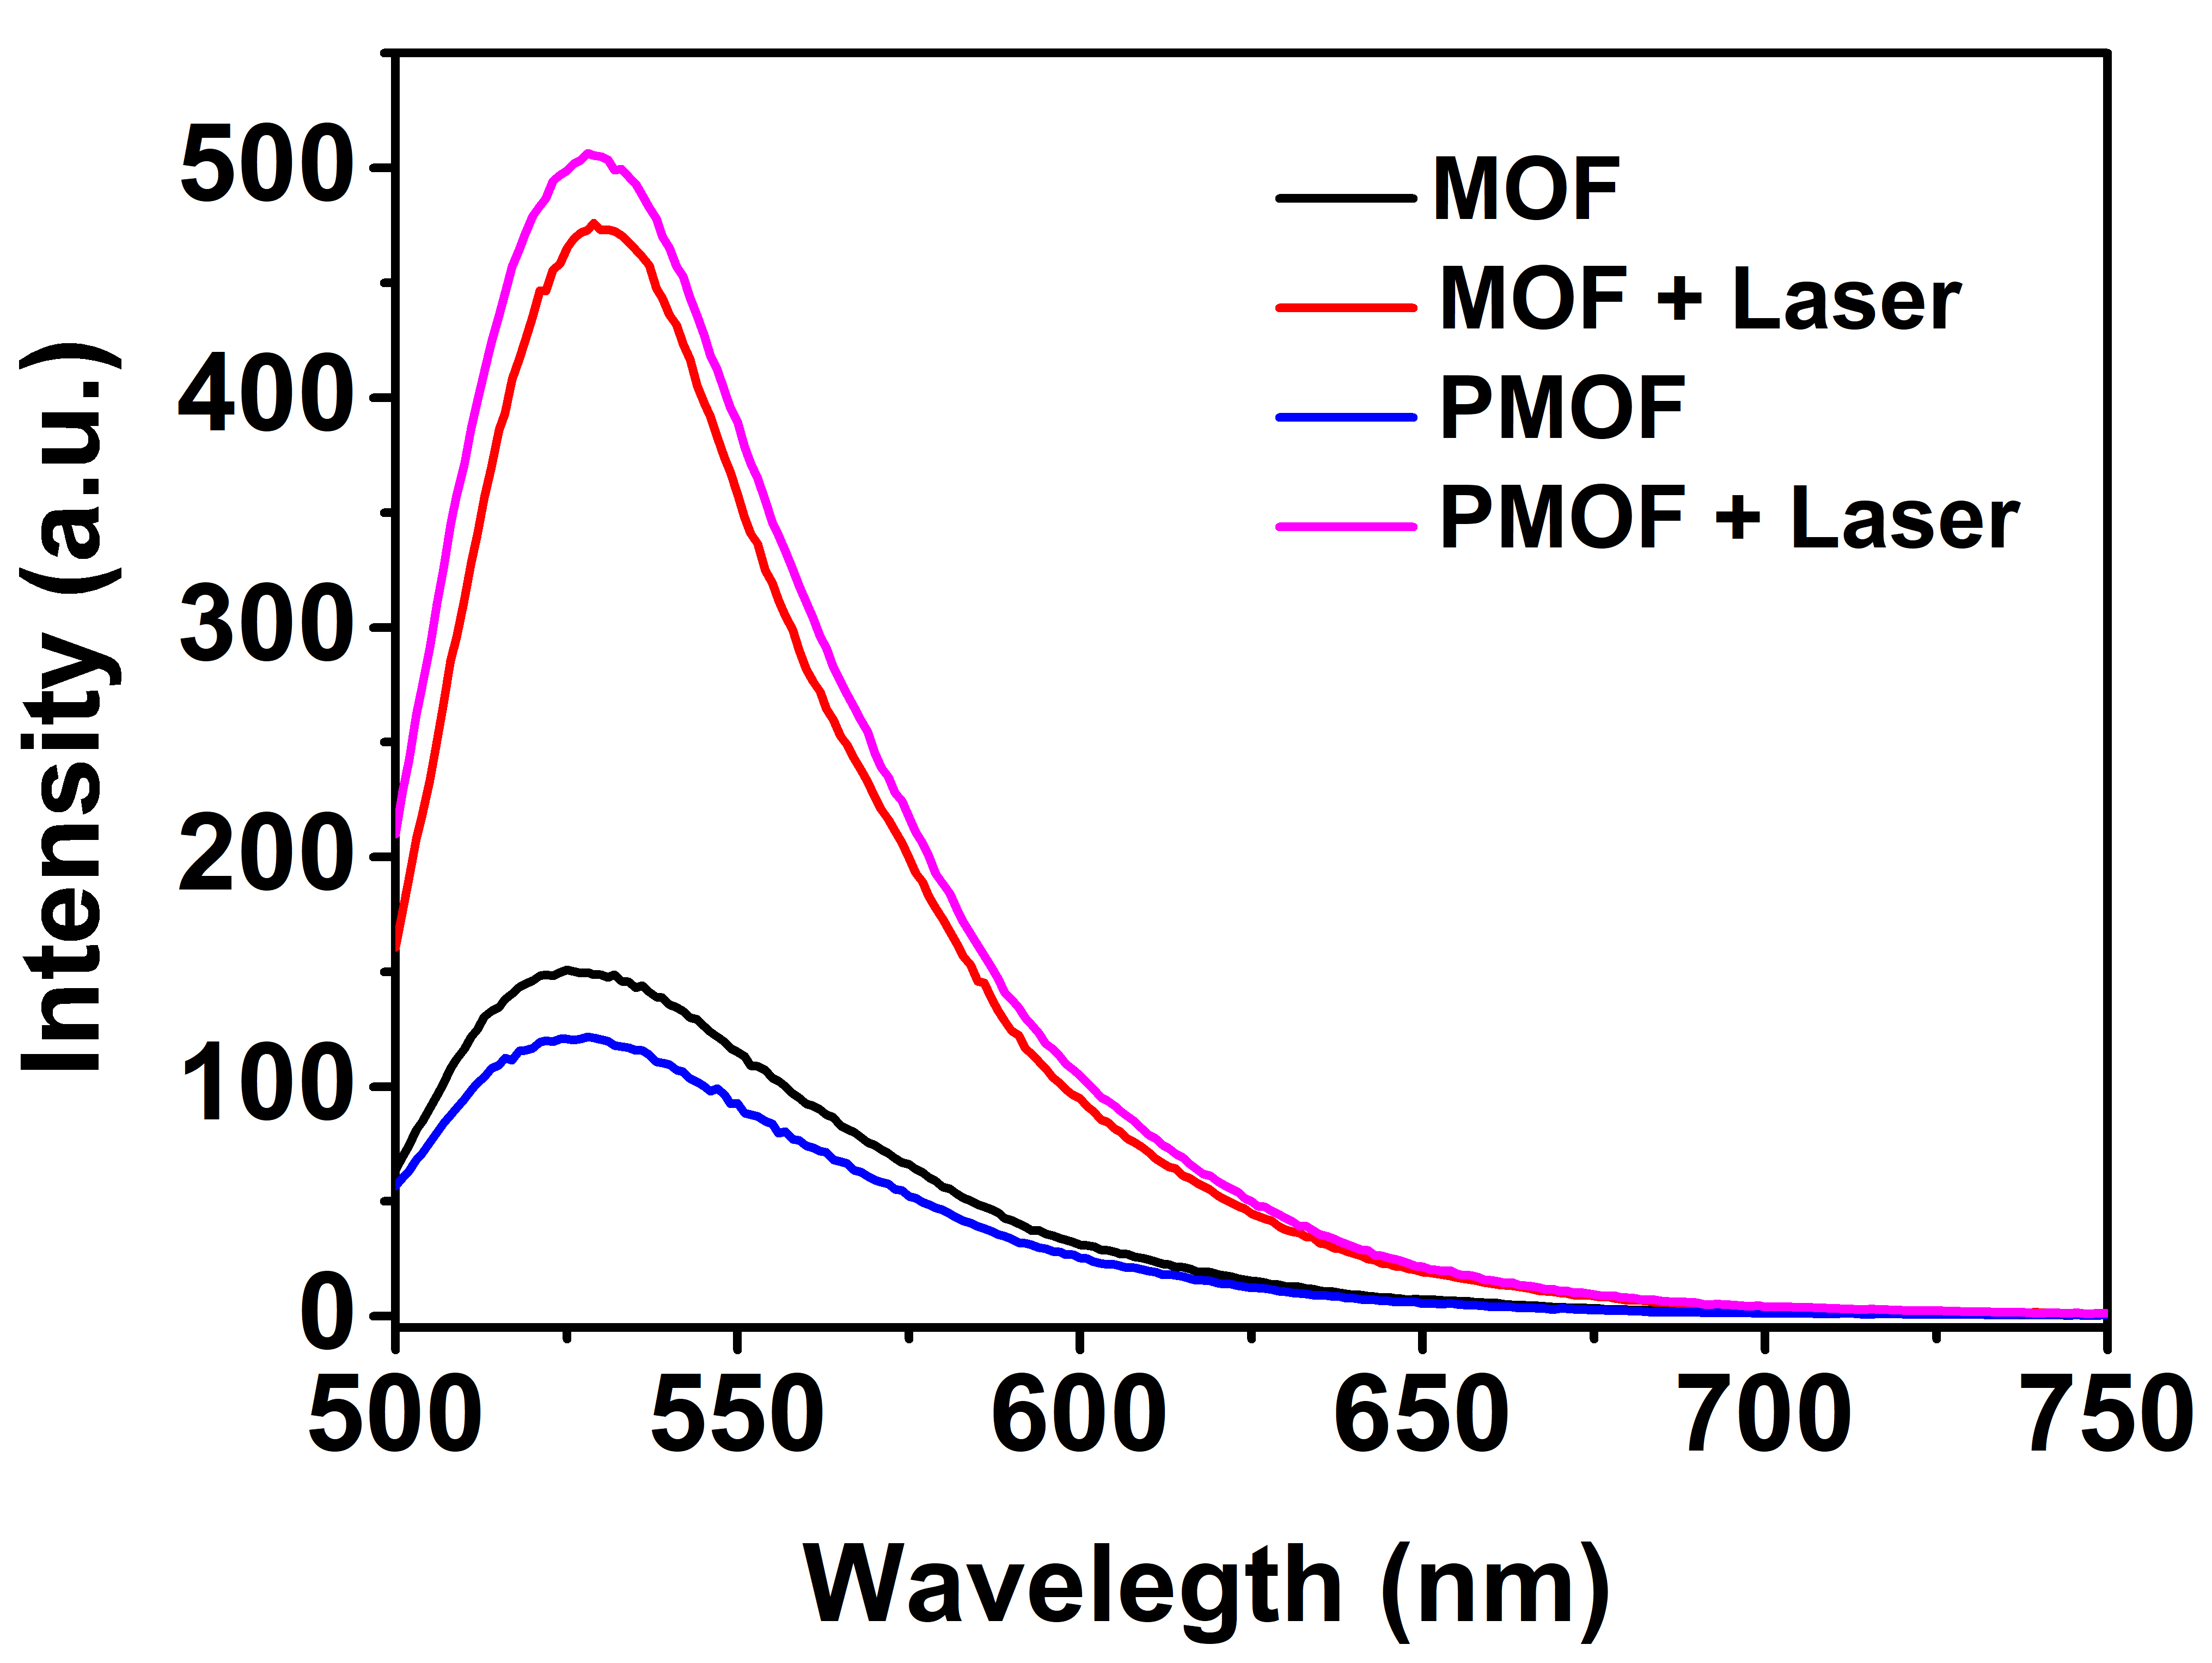


**Figure S4** Fluorescence spectra of SOSG in the presence of MOF and PMOF nanosheets with or without laser irradiation.


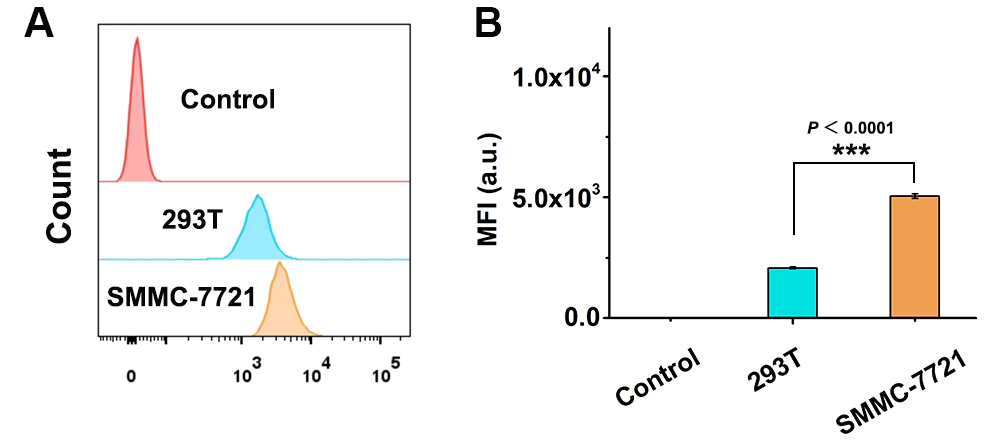


**Figure S5** **(A)** Flow cytometry analysis of Cy5 fluorescence inside 293T and SMMC-7721 cells after incubated with Cy5-labeled PMOF@HA for 4 h. **(B)** The corresponding mean fluorescence intensity (MFI) in **(A)** (n = 3). ****P* < 0.001.


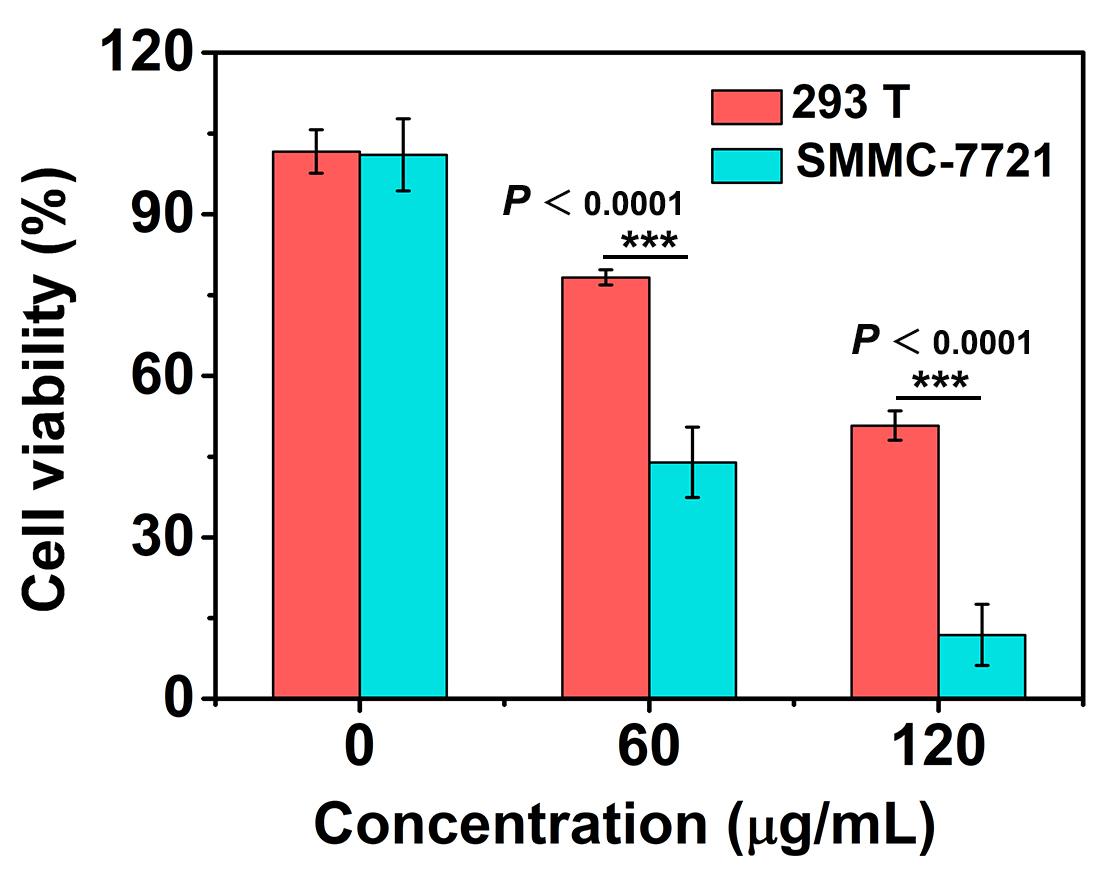


**Figure S6** Cell viabilities of 293T and SMMC-7721 cells treated with various concentrations of PMOF@HA and laser irradiation (n = 4).


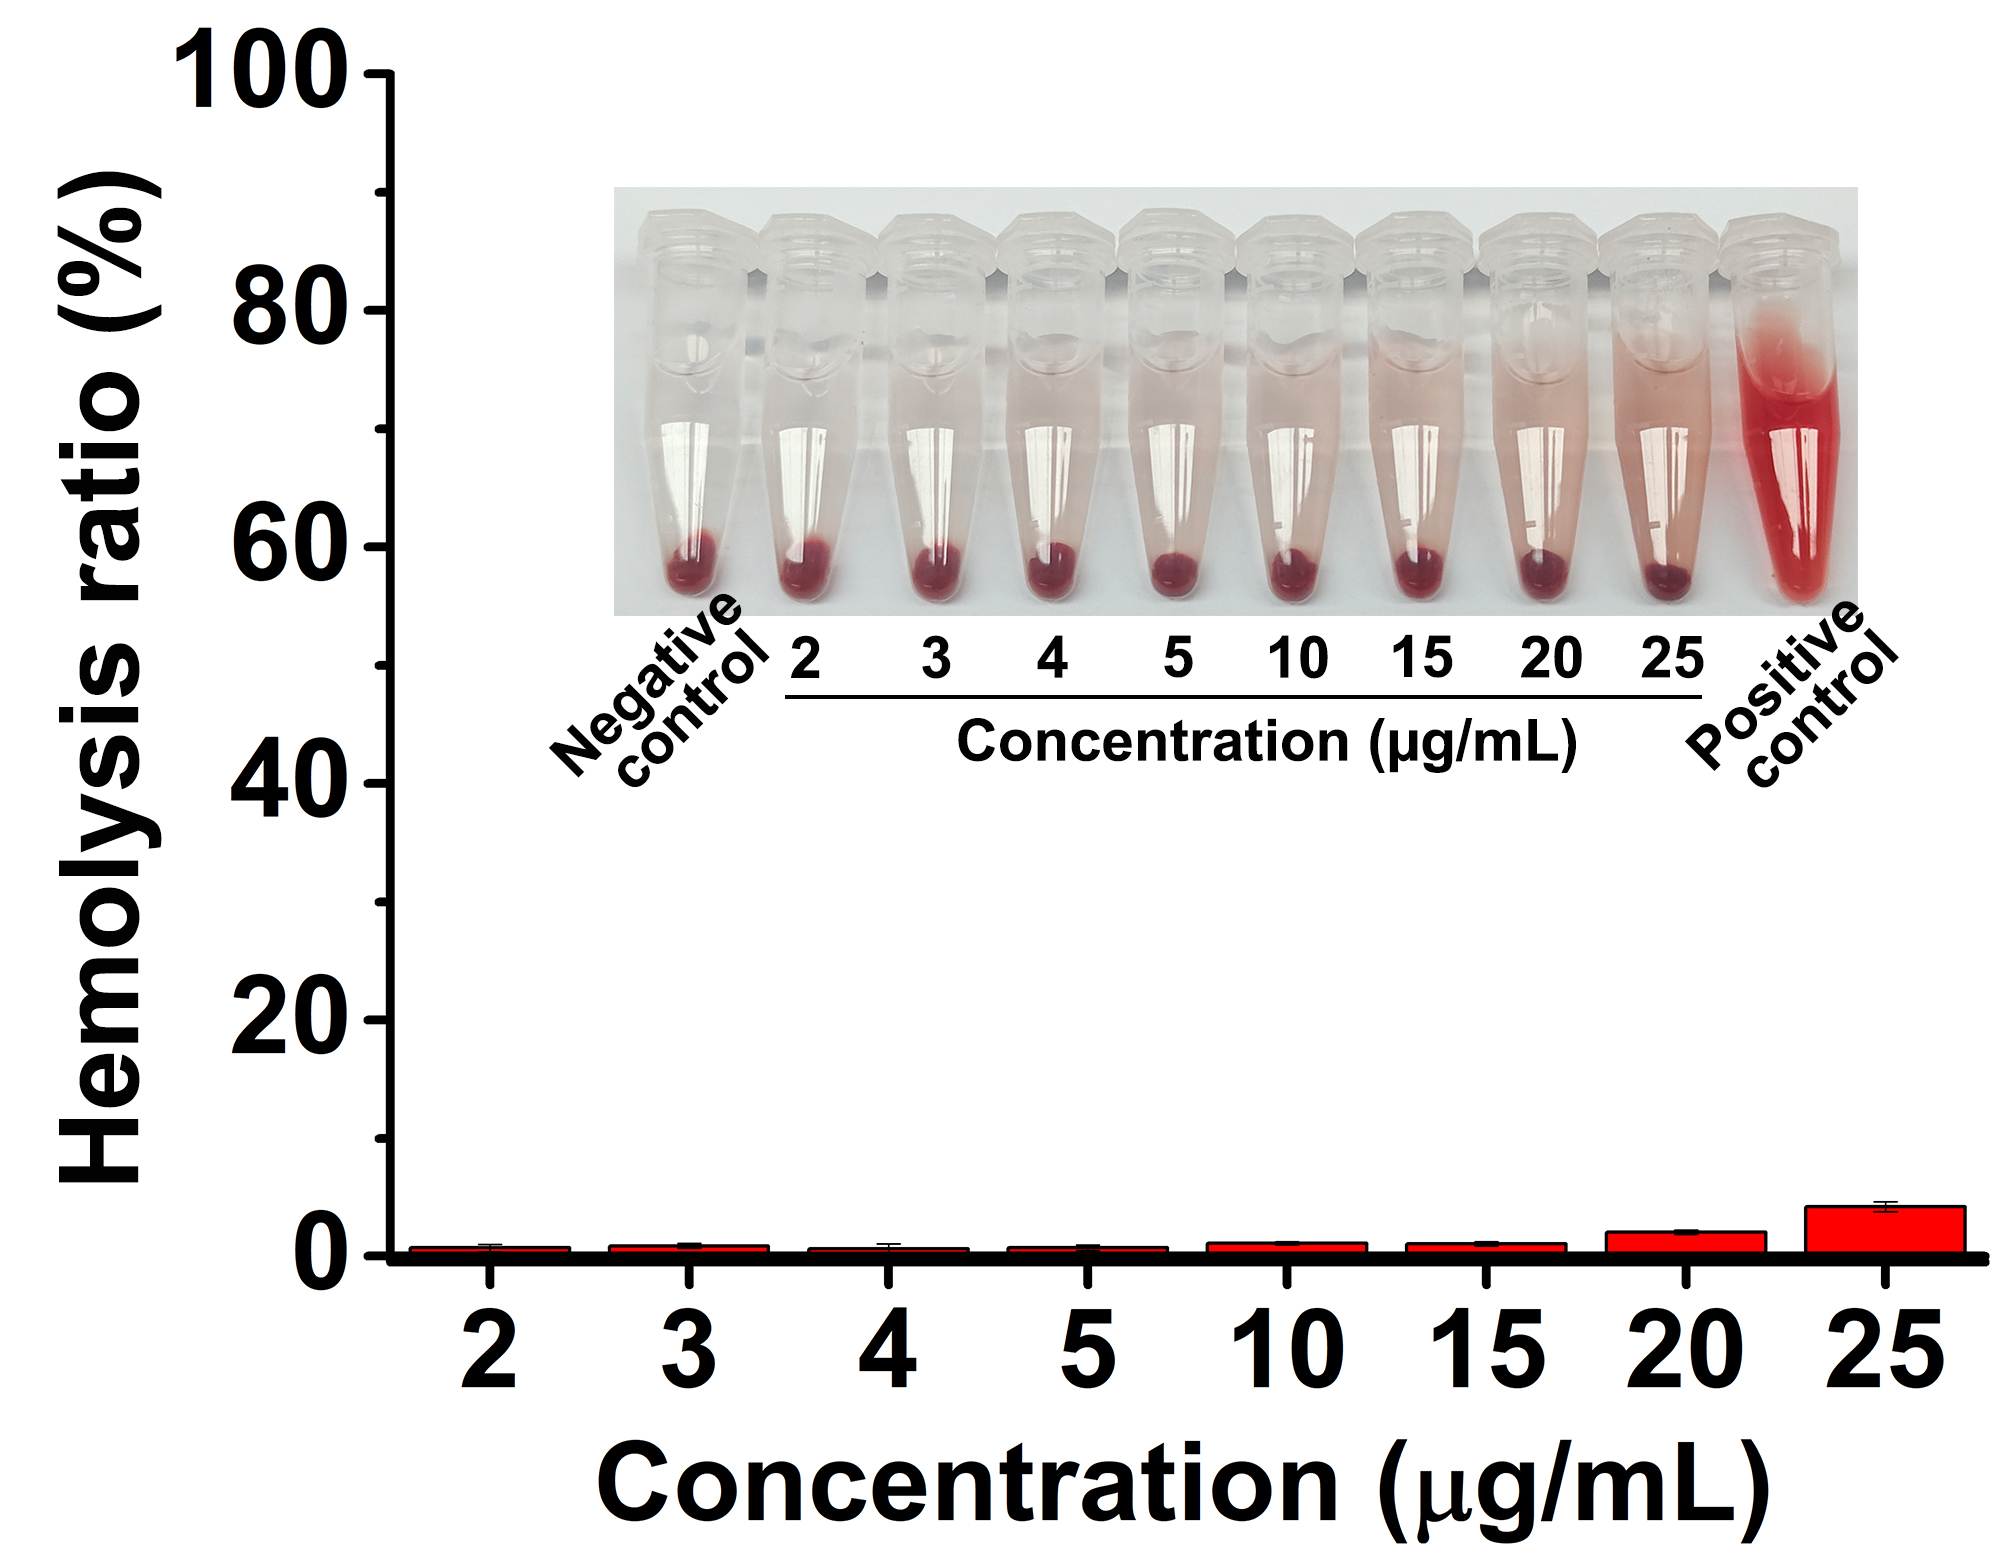


**Figure S7** Hemolysis assay of PMOF@HA with various concentrations.


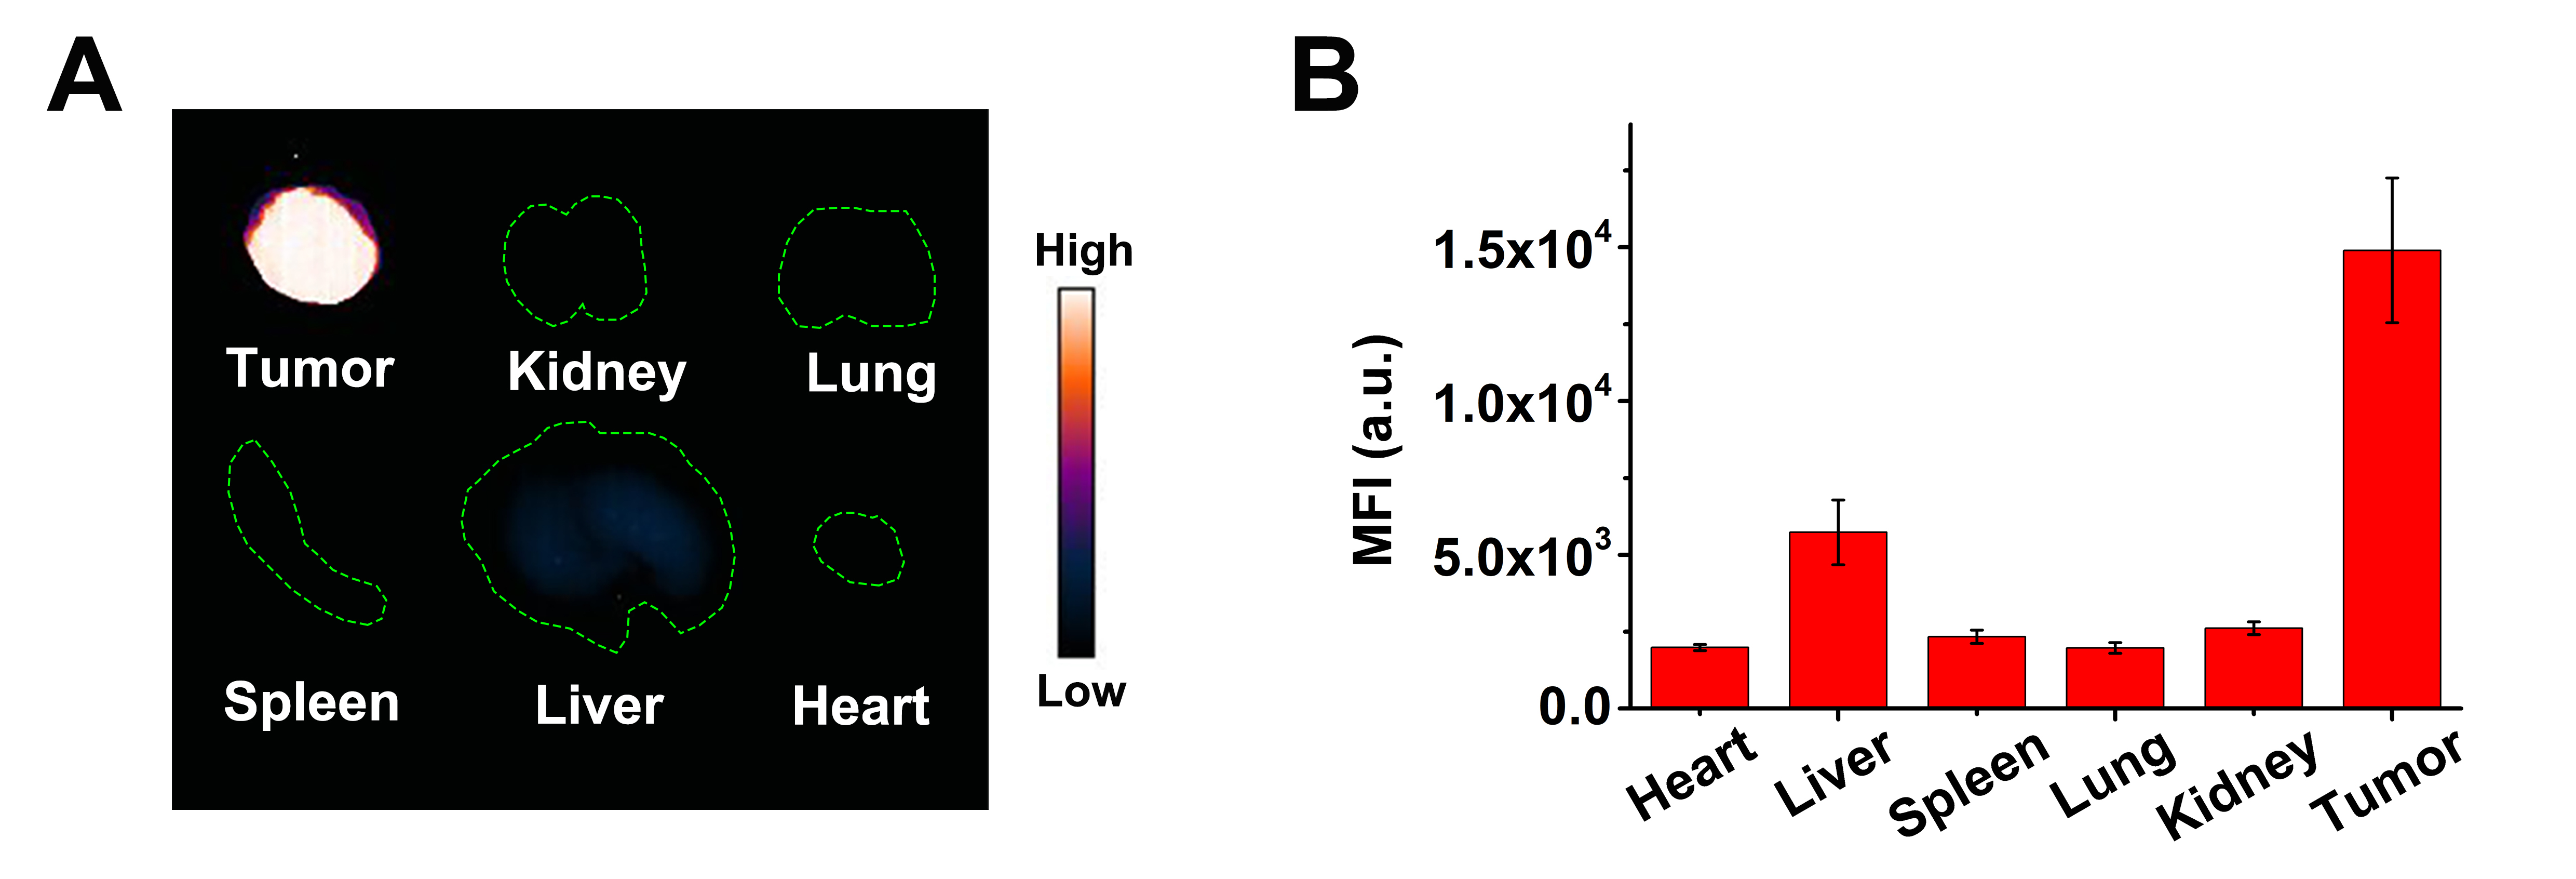


**Figure S8** **(A)** Fluorescence images of excised major organs and tumor of mice after injection intratumorally with ICG labeled PMOF@HA for 72 h. **(B)** The mean fluorescence intensities of excised major organs and tumor in **(A)**.


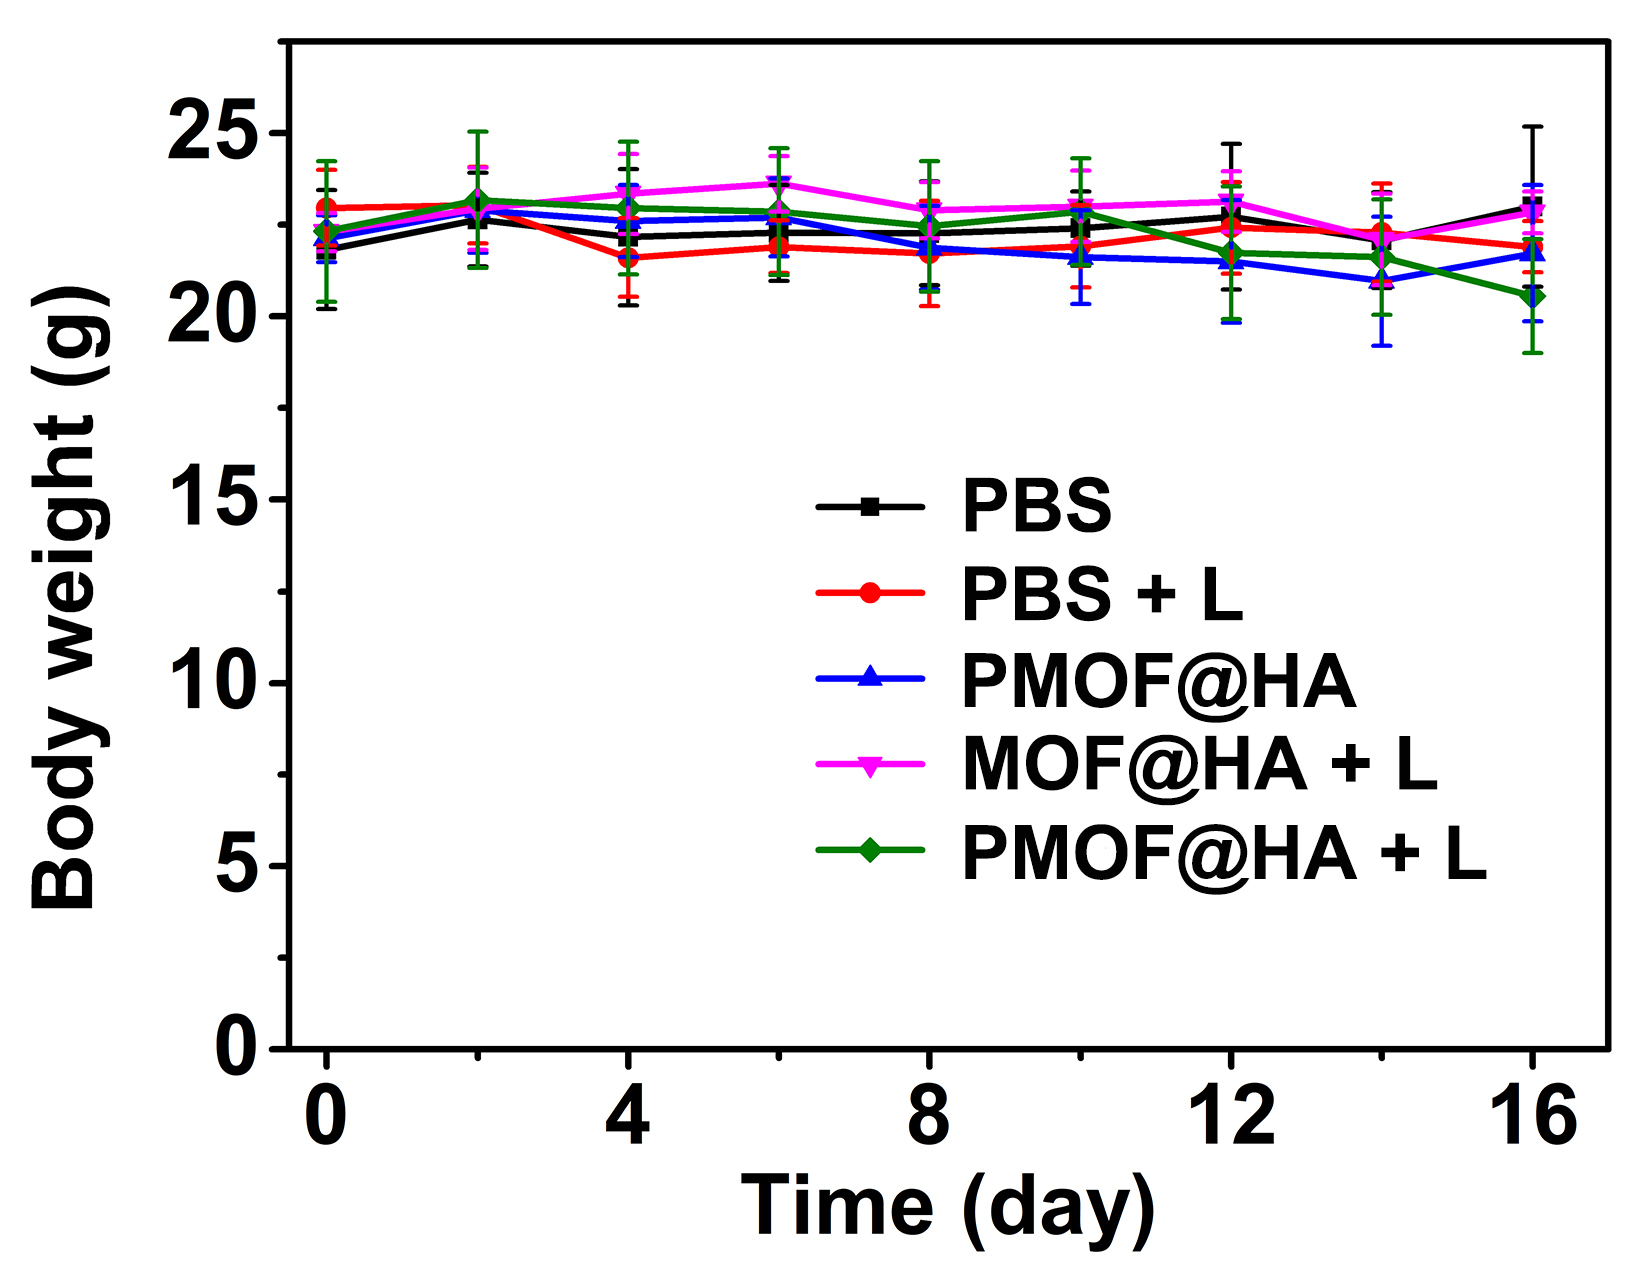


**Figure S9** Average body weights of mice in different groups (n = 5).
